# Supplementary material for: Performance of Novel Antimicrobial Protein Bg_9562 and In Silico Predictions on Its Properties with Reference to Its Antimicrobial Efficiency against Rhizoctonia solani
Source: MDPI journal article supplement (doi:10.3390/antibiotics11030363), 2022-03-08
Supplement: s1 [file s1]

## Supplementary Materials

## ConSurf Results

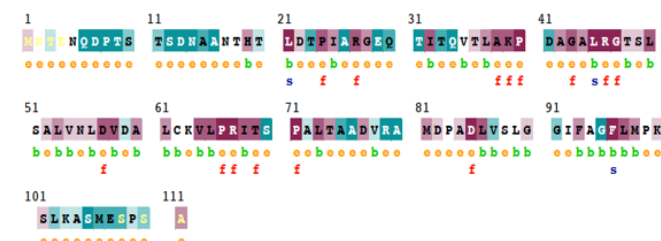

**The conservation scale:**

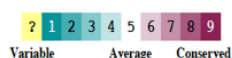

- e** - An exposed residue according to the neural-network algorithm.
- b** - A buried residue according to the neural-network algorithm.
- f** - A predicted functional residue (highly conserved and exposed).
- s** - A predicted structural residue (highly conserved and buried).
- ?** - Insufficient data - the calculation for this site was performed on less than 10% of the sequences.

**a**

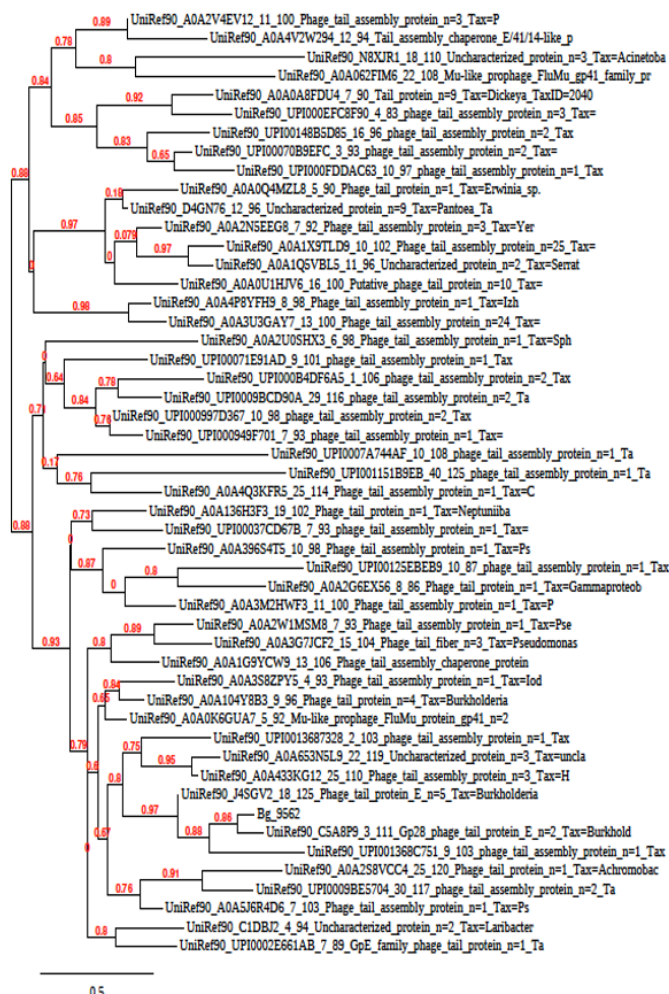

**b**

**Figure S1.** Functional properties of Bg\_9562 predicted using Consurf server. a) Prediction of functional residues in Bg\_9562 using Consurf server b) Representation of 50 molecular sequences homologous to Bg\_9562 in the form of phylogenetic tree using Phylogeny.fr tool

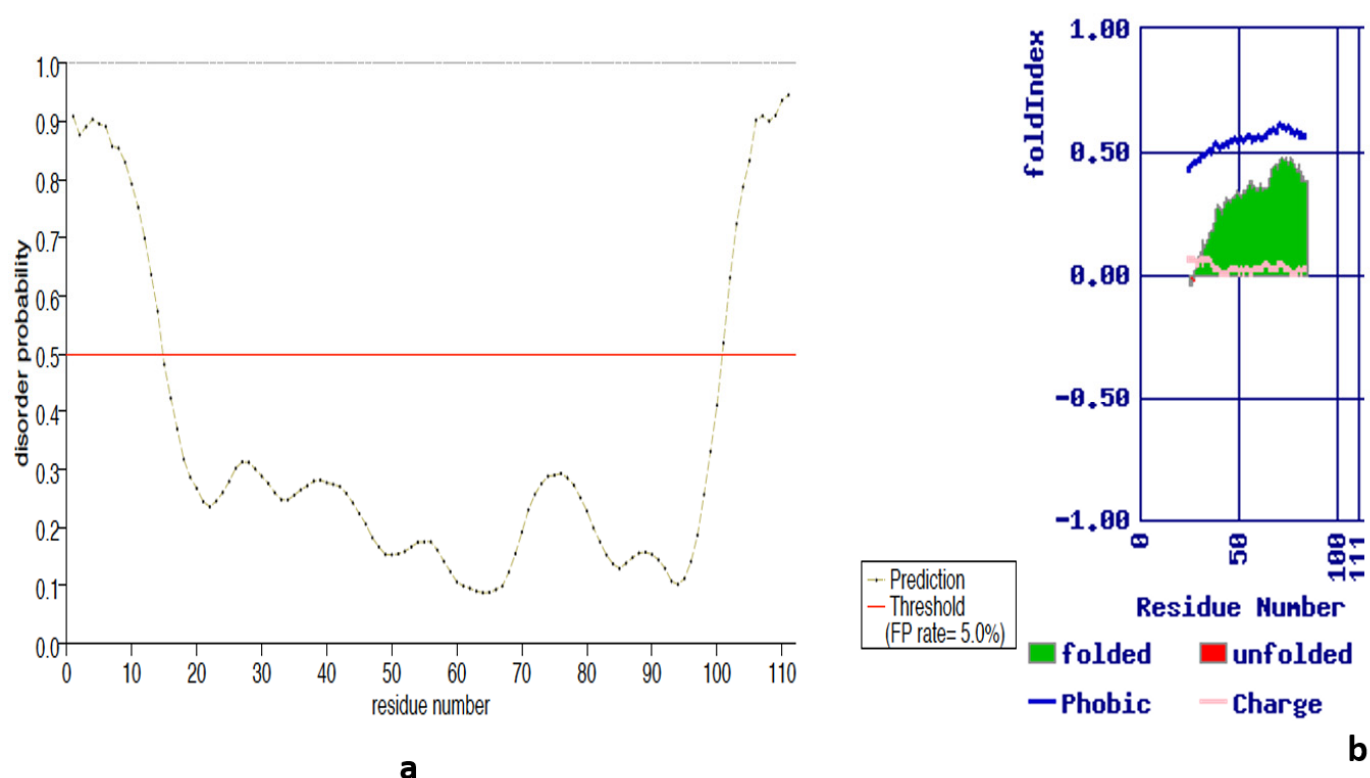

**Figure S2.** Prediction of disordered region of Bg\_9562 using PrDOS and fold index® tools. a) Prediction of disorder regions of Bg\_9562 prediction using PrDOS server. 1-14 residues at N-terminal end and 101-111 residues at C-terminal end were predicted disordered regions in Bg\_9562. b) Prediction of disordered regions of Bg\_9562 using fold index tool. 1-26 residues of N-terminal region were predicted as disordered region in Bg\_9562. The other output parameters of fold index include unfoldability 0.202 and charge: 0.036, Phobic: 0.499.

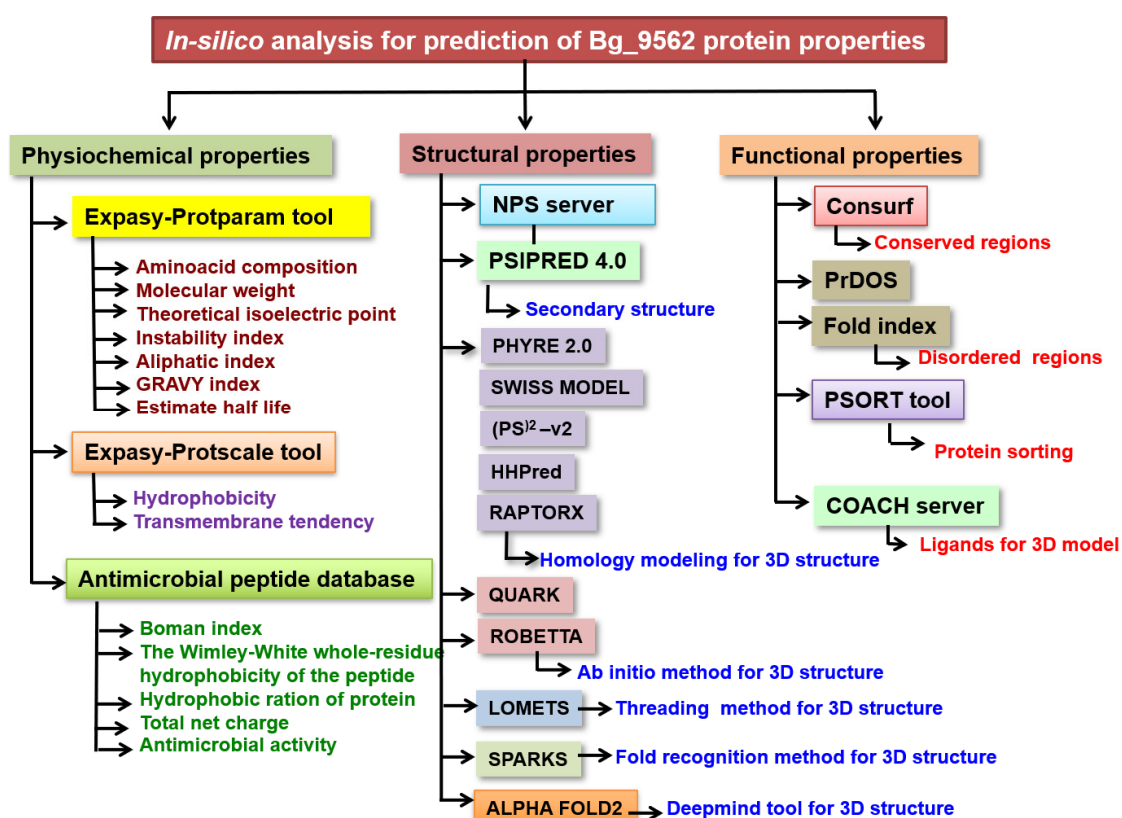Figure S3. Flow diagram describing the *in-silico* tools used in the study.Table S1. Effect of Bg\_9562 protein on *R.solani* mycelial growth.

| Parameter   | Incubation period                                                                           |        |        |                                                                        |        |        |                                                                                         |        |        |
|-------------|---------------------------------------------------------------------------------------------|--------|--------|------------------------------------------------------------------------|--------|--------|-----------------------------------------------------------------------------------------|--------|--------|
|             | 6 hrs of incubation in the treated protein and mycelial growth in PDA plates observed after |        |        | 12 hrs of incubation in the protein and mycelial growth observed after |        |        | 24 hr incubation of incubation in the in the protein and mycelial growth observed after |        |        |
|             | 12 hrs                                                                                      | 24 hrs | 48 hrs | 12 hrs                                                                 | 24 hrs | 48 hrs | 12 hrs                                                                                  | 24 hrs | 48 hrs |
| pH          | 3.0                                                                                         | +      | +      | +                                                                      | +      | +      | +                                                                                       | +      | +      |
|             | 9.5                                                                                         | +      | +      | +                                                                      | +      | +      | +                                                                                       | +      | +      |
|             | 35°C                                                                                        | –      | –      | –                                                                      | –      | –      | –                                                                                       | –      | –      |
|             | 45°C                                                                                        | –      | –      | –                                                                      | –      | –      | –                                                                                       | –      | –      |
|             | -ve control ( <i>R.solani</i> )                                                             | +      | +      | +                                                                      | +      | +      | +                                                                                       | +      | +      |
| Temperature | +ve control ( <i>R.solani</i> + protein)                                                    | +      | +      | +                                                                      | +      | +      | +                                                                                       | +      | +      |

“+” – Mycelial growth is seen; “–” Mycelial growth is not seen  
 Table S2: Protein efficiency check under field conditions in cultivar TN1.

**Table S2.** Protein efficiency check under field conditions in cultivar TN1.

| S. No | Treatments             | Concentration | R1   | R2   | R3   | Mean<br>(Observed) | Mean<br>(Treated) | % increase in<br>disease over<br>standard<br>check |
|-------|------------------------|---------------|------|------|------|--------------------|-------------------|----------------------------------------------------|
| 1     | Pre inoculation spray  | 2.5 ppm       | 96.1 | 94.7 | 98.6 | 96.4               | 79.5              | 53.19                                              |
| 2     | Co-inoculation spray   | 2.5 ppm       | 92.3 | 95.3 | 90.2 | 92.6               | 74.3              | 49.96                                              |
| 3     | Post inoculation spray | 2.5 ppm       | 90.1 | 92.4 | 98.3 | 93.6               | 76.0              | 51.07                                              |
| 4     | Pre inoculation spray  | 5.0 ppm       | 86.4 | 88.5 | 84.3 | 86.4               | 68.4              | 45.59                                              |
| 5     | Co-inoculation spray   | 5.0 ppm       | 78.3 | 83.2 | 81.1 | 80.9               | 64.1              | 41.93                                              |
| 6     | Post inoculation spray | 5.0 ppm       | 84.8 | 82.3 | 81.9 | 83.0               | 65.6              | 43.33                                              |
| 7     | Pre inoculation spray  | 7.5 ppm       | 81.8 | 80.0 | 78.9 | 80.2               | 63.6              | 41.50                                              |
| 8     | Co-inoculation spray   | 7.5 ppm       | 78.3 | 77.9 | 78.3 | 78.2               | 62.1              | 40.11                                              |
| 9     | Post inoculation spray | 7.5 ppm       | 79.0 | 77.0 | 78.9 | 78.3               | 62.2              | 40.21                                              |
| 10    | Pre inoculation spray  | 10.0 ppm      | 74.0 | 79.1 | 76.5 | 76.5               | 61.0              | 39.04                                              |
| 11    | Co-inoculation spray   | 10.0 ppm      | 78.8 | 79.7 | 77.1 | 78.5               | 62.4              | 40.37                                              |
| 12    | Post inoculation spray | 10.0 ppm      | 76.6 | 79.4 | 77.2 | 77.7               | 61.8              | 39.83                                              |
| 13    | Carbendazim 50% WP     | 1 g/l         | 41.4 | 34.7 | 33.9 | 36.7               | 37.2              | 0.09                                               |
| 14    | Untreated control      | -             | 91.1 | 94.7 | 92.6 | 92.8               | 74.5              | 50.06                                              |

**Table S3.** Amino acid sequence of Bg\_9562 protein.

|                |                                                                                                                   |
|----------------|-------------------------------------------------------------------------------------------------------------------|
| <b>Bg_9562</b> | MNTENQDPTSTSDNAANTHTLDTPIARGEQTITQVTLAKPDAGALRGTSLSALVNLVDALCKVLPRTS<br>PALTAADVRAMDPADLVSLGGIFAGFLMPKSLKASMESPSA |
|----------------|-------------------------------------------------------------------------------------------------------------------|

**Table S4.** List of online tools and their URLs utilized in the study.

| Online<br>tool/server/software | URL                                                                                                                                                                              |
|--------------------------------|----------------------------------------------------------------------------------------------------------------------------------------------------------------------------------|
| Expasy-Translate               | <a href="http://us.expasy.org/tools/protparam.html/">http://us.expasy.org/tools/protparam.html/</a>                                                                              |
| Expasy-ProtScale               | <a href="http://web.expasy.org/protscale">http://web.expasy.org/ protscale</a>                                                                                                   |
| Expasy-ProtParam               | <a href="http://web.expasy.org/proparam">http://web.expasy.org/ proparam</a>                                                                                                     |
| Kyte-Doolittle                 |                                                                                                                                                                                  |
| Online Hydropathy<br>plot      | <a href="http://gcat.davidson.edu/DGPB/kd/kyte-doolittle">http://gcat.davidson.edu/DGPB /kd/kyte-doolittle</a>                                                                   |
| ADP v2.34                      | <a href="http://aps.unmc.edu/AP/main.php">http://aps.unmc.edu/AP/main.php</a>                                                                                                    |
| TMpred                         | <a href="http://www.ch.embnet.org/software/TMPRED_form.html">http://www.ch.embnet.org/software/TMPRED_form.html</a>                                                              |
| TMHMM                          | <a href="http://www.cbs.dtu.dk/services/TMHMM/">http://www.cbs.dtu.dk/services/TMHMM/</a>                                                                                        |
| MEME                           | <a href="https://meme-suite.org">https://meme-suite.org</a>                                                                                                                      |
| PSORT                          | <a href="http://psort.nibb.ac.jp">http://psort.nibb.ac.jp</a>                                                                                                                    |
| CRYSTALP2                      | <a href="http://biomine.cs.vcu.edu/servers/CRYSTALP2">http://biomine.cs.vcu.edu/servers/CRYSTALP2</a>                                                                            |
| PPCpred                        | <a href="http://biomine.cs.vcu.edu/servers/PPCpred">http://biomine.cs.vcu.edu/servers/PPCpred</a>                                                                                |
| ConSurf                        | <a href="https://consurf.tau.ac.il">https://consurf.tau.ac.il</a>                                                                                                                |
| Phylogeny.fr                   | <a href="http://www.phylogeny.fr/index.cgi">http://www.phylogeny.fr/index.cgi</a>                                                                                                |
| PSIPRED 4.0                    | <a href="http://bioinf.cs.ucl.ac.uk/psipred">http://bioinf.cs.ucl.ac.uk/psipred</a>                                                                                              |
| NPS server                     | <a href="https://npsa-prabi.ibcp.fr/cgi-bin/npsa_automat.pl?page=/NPSA/npsa_server.html">https://npsa-prabi.ibcp.fr/cgi-<br/>bin/npsa_automat.pl?page=/NPSA/npsa_server.html</a> |

|                                               |                                                                                                                                                                                                               |
|-----------------------------------------------|---------------------------------------------------------------------------------------------------------------------------------------------------------------------------------------------------------------|
| Phyre 2                                       | <a href="http://www.sbg.bio.ic.ac.uk/phyre2">http://www.sbg.bio.ic.ac.uk/phyre2</a>                                                                                                                           |
| RaptorX                                       | <a href="http://raptorx.uchicago.edu/StructurePrediction/predict/">http://raptorx.uchicago.edu/StructurePrediction/predict/</a>                                                                               |
| SWISS MODEL                                   | <a href="https://swissmodel.expasy.org">https://swissmodel.expasy.org</a>                                                                                                                                     |
| LOMETS                                        | <a href="http://zhanglab.ccmb.med.umich.edu/LOMETS">http://zhanglab.ccmb.med.umich.edu/LOMETS</a>                                                                                                             |
| I-TASSER                                      | <a href="http://zhanglab.ccmb.med.umich.edu/I-TASSER">http://zhanglab.ccmb.med.umich.edu/I-TASSER</a>                                                                                                         |
| SPARKS                                        | <a href="http://sparks-lab.org/yueyang/server/SPARKS-X/">http://sparks-lab.org/yueyang/server/SPARKS-X/</a>                                                                                                   |
| QUARK                                         | <a href="http://zhanglab.ccmb.med.umich.edu/QUARK">http://zhanglab.ccmb.med.umich.edu/QUARK</a>                                                                                                               |
| Robetta                                       | <a href="https://robetta.bakerlab.org">https://robetta.bakerlab.org</a>                                                                                                                                       |
| Alpha fold2 on<br>Googles Colab's<br>Notebook | <a href="https://colab.research.google.com/github/deepmind/alphafold/blob/main/notebooks/AlphaFold.ipynb">https://colab.research.google.com/github/deepmind/alphafold/blob/main/notebooks/AlphaFold.ipynb</a> |
| PROCHECK                                      | <a href="https://servicesn.mbi.ucla.edu/PROCHECK">https://servicesn.mbi.ucla.edu/PROCHECK</a>                                                                                                                 |
| QMEAN 4                                       | <a href="https://swissmodel.expasy.org/qmean">https://swissmodel.expasy.org/qmean</a>                                                                                                                         |
| PROSA                                         | <a href="https://prosa.services.came.sbg.ac.at/prosa.php">https://prosa.services.came.sbg.ac.at/prosa.php</a>                                                                                                 |
| COACH server                                  | <a href="https://zhanglab.ccmb.med.umich.edu/COACH">https://zhanglab.ccmb.med.umich.edu/COACH</a>                                                                                                             |
| PrDOS                                         | <a href="http://prdoss.hgc.jp/cgi-bin/top.cgi">http://prdoss.hgc.jp/cgi-bin/top.cgi</a>                                                                                                                       |
| Fold index <sup>®</sup>                       | <a href="http://bioportal.weizmann.ac.il/fldbin/findex">http://bioportal.weizmann.ac.il/fldbin/findex</a>                                                                                                     |

**Table S5.** Amino acid composition in Bg\_9562 protein.

| Amino acid | Composition in Bg_9562 protein | % of amino acid composition |
|------------|--------------------------------|-----------------------------|
| Ala (A)    | 16                             | 14.4                        |
| Arg (R)    | 4                              | 3.6                         |
| Asn (N)    | 5                              | 4.5                         |
| Asp (D)    | 9                              | 8.1                         |
| Cys (C)    | 1                              | 0.9                         |
| Gln (Q)    | 3                              | 2.7                         |
| Glu (E)    | 3                              | 2.7                         |
| Gly (G)    | 6                              | 5.4                         |
| His (H)    | 1                              | 0.9                         |
| Ile (I)    | 4                              | 3.6                         |
| Leu (L)    | 13                             | 11.7                        |
| Lys (K)    | 4                              | 3.6                         |
| Met (M)    | 4                              | 3.6                         |
| Phe (F)    | 2                              | 1.8                         |
| Pro (P)    | 8                              | 7.2                         |
| Ser (S)    | 10                             | 9.0                         |
| Thr (T)    | 12                             | 10.8                        |
| Trp (W)    | 0                              | 0                           |
| Tyr (Y)    | 0                              | 0                           |
| Val (V)    | 6                              | 5.4                         |
| Pyl (O)    | 0                              | 0                           |
| Sec (U)    | 0                              | 0                           |

**Table S6.** Minimum and maximum values of physiochemical properties of Bg\_9562 protein predicted using *Protscale*.

| S.No. | Property                            | Minimum value | Maximum value |
|-------|-------------------------------------|---------------|---------------|
| 1     | Bulkiness                           | 0.437         | 0.802         |
| 2     | Polarity                            | 0.222         | 0.676         |
| 3     | Refractivity                        | 0.208         | 0.460         |
| 4     | Hydrophobicity (Kyte and Doolittle) | 0.237         | 0.738         |
| 5     | Transmembrane tendency              | 0.353         | 0.828         |
| 6     | Buried residues                     | 0.197         | 0.792         |
| 7     | Accessible residues                 | 0.356         | 0.697         |
| 8     | Ration of hetero end/side           | 0.059         | 0.389         |
| 9     | Average flexibility                 | 0.426         | 0.778         |
| 10    | Relative mutability                 | 0.329         | 0.810         |

**Table S7.** Models of Bg\_9562 with different methods and their evaluation results.

| Model/Tool            | Approach          | PROSA Z-score | Qmean4       | Verify 3D   | ERRAT         | Outlier   | Allowed region | Favored region |
|-----------------------|-------------------|---------------|--------------|-------------|---------------|-----------|----------------|----------------|
| QUARK-1               | Ab initio         | -4.92         | -9.47        | 100%        | 73.78         | 6.3%      | 33.7%          | 53.7%          |
| QUARK-2               | Ab initio         | -5.37         | -7.43        | 99.1%       | 87.37         | 2.1%      | 33.7%          | 60.0%          |
| QUARK-3               | Ab initio         | -2.97         | -9.68        | 100%        | 75.72%        | 4.2%      | 36.8%          | 53.7%          |
| QUARK-4               | Ab initio         | -3.49         | -9.41        | 100%        | 72.81%        | 4.2%      | 30.5%          | 56.8%          |
| QUARK-5               | Ab initio         | -4.32         | -9.3         | 100%        | 91.2%         | 6.3%      | 29.5%          | 60.0%          |
| Robetta-1             | Ab initio         | -6.87         | -2.25        | 89.19%      | 93.93%        | 0%        | 12.6%          | 86.3%          |
| Robetta-2             | Ab initio         | -5.92         | -1.33        | 100%        | 97%           | 1.1%      | 10.5%          | 87.4%          |
| Robetta-3             | Ab initio         | -6.3          | -1.15        | 100%        | 98.01%        | 0%        | 18.9%          | 80.0%          |
| <b>Robetta-4</b>      | <b>Ab initio</b>  | <b>-7.4</b>   | <b>-1.42</b> | <b>100%</b> | <b>98.05%</b> | <b>0%</b> | <b>12.6%</b>   | <b>87.4%</b>   |
| Robetta-5             | Ab initio         | -5.44         | -1.16        | 100%        | 96.03%        | 1.1%      | 6.3%           | 92.6%          |
| LOMETS-1              | Threading         | -4.23         | -2.83        | 68.4%       | 38%           | 1.1%      | 9.5%           | 89.5%          |
| LOMETS-2              | Threading         | -3.32         | -4.46        | 37.84%      | 44.89%        | 2.1%      | 11.6%          | 86.3%          |
| LOMETS-3              | Threading         | -3.05         | -3.74        | 87.39%      | 60            | 1.1%      | 9.5%           | 88.4%          |
| LOMETS-4              | Threading         | -3.6          | -4.11        | 56.76%      | 46.5          | 1.1%      | 5.3%           | 91.6%          |
| LOMETS-5              | Threading         | -2.21         | -5.08        | 36.94%      | 39.1          | 1.1%      | 8.4%           | 89.5%          |
| SPARKS-1              | Fold recognition  | -4            | -6.99        | 96.4%       | 56.4          | 0%        | 16.8%          | 75.8%          |
| SPARKS-2              | Fold recognition  | -2.59         | -7.96        | 75.68%      | 33.9          | 0%        | 20.0%          | 76.8%          |
| SPARKS-3              | Fold recognition  | -2.66         | -6.61        | 76.58%      | 35.9          | 0%        | 14.7%          | 82.1%          |
| SPARKS-4              | Fold recognition  | -1.87         | -6.85        | 83.78%      | 25.2          | 2.1%      | 14.7%          | 81.1%          |
| SPARKS-5              | Fold recognition  | -3.75         | -9.39        | 23.42%      | 30.09         | 2.1%      | 26.3%          | 67.4%          |
| SPARKS-6              | Fold recognition  | -1.13         | -6.20        | 50.45%      | 21.6          | 1.1%      | 20.0%          | 76.8%          |
| SPARKS-7              | Fold recognition  | -2.93         | -6.21        | 85.59%      | 29.12         | 1.1%      | 14.7%          | 80.0%          |
| SPARKS-8              | Fold recognition  | -4.81         | -4.97        | 83.74%      | 46.6          | 0%        | 18.9%          | 78.9%          |
| SPARKS-9              | Fold recognition  | -3.18         | -6.65        | 50.4%       | 63            | 1.1%      | 12.6%          | 82.1%          |
| SPARKS-10             | Fold recognition  | -3.04         | -6.30        | 72.70%      | 41.5          | 1.1%      | 13.7%          | 83.2%          |
| PHYRE 2.0             | Homology modeling | -0.96         | -2.15        | 0%          |               | 0%        | 4.8%           | 95.2%          |
| (PS) <sup>2</sup> -v2 | Homology modeling | -3.61         | -5.86        | 36.94%      | 45.54         | 3.2%      | 9.5%           | 86.3%          |
| SWISS-model-1         | Homology modeling | -2.4          | -2.93        | 61.9%       | 100           | 0%        | 9.1%           | 87.9%          |
| SWISS-model-2         | Homology modeling | -1.08         | -1.76        | 0%          | 100           | 0%        | 15.6%          | 84.4%          |

|          |                   |       |       |        |       |      |      |       |
|----------|-------------------|-------|-------|--------|-------|------|------|-------|
| RAPTORX  | Homology modeling | -0.26 | -4.71 | 12.61% | 63.52 | 2.1% | 4.2% | 91.6% |
| HHpred-1 | Homology modeling | -2.94 | -1.07 | 0      | 41.6% | 0%   | 0%   | 100%  |

Table S8. Motifs predicted in Bg\_9562 primary sequence.

| Motif logo                                                                        | p-value  | Start | E-value  | Site count | Width |
|-----------------------------------------------------------------------------------|----------|-------|----------|------------|-------|
|  | 3.87e-9  | 62    | 7.8e+001 | 2          | 7     |
|                                                                                   | 9.69e-8  | 26    |          |            |       |
|  | 1.93e-8  | 2     | 3.0e+001 | 2          | 6     |
|                                                                                   | 7.17e-7  | 17    |          |            |       |
|  | 3.64e-10 | 91    | 1.8e+002 | 2          | 8     |
|                                                                                   | 3.04e-8  | 39    |          |            |       |

Table S9. Evaluation of efficacy of Bg\_9562 protein molecule against sheath blight of rice (*Cv. TN-1*) under field conditions at ICAR-IIRR, Hyderabad.

| S. No | Treatments             | Concentration | Area/Plants      | Spray volume/Tr | *Spray volume/Con |
|-------|------------------------|---------------|------------------|-----------------|-------------------|
| 1     | Pre inoculation spray  | 2.5 ppm       | 30Plants (10X3R) | 833 ml          | 2500ml            |
| 2     | Co-inoculation spray   | 2.5 ppm       | 30Plants         | 833 ml          |                   |
| 3     | Post inoculation spray | 2.5 ppm       | 30 Plants        | 833 ml          |                   |
| 4     | Pre inoculation spray  | 5.0 ppm       | 30Plants (10X3R) | 833 ml          | 2500ml            |
| 5     | Co-inoculation spray   | 5.0 ppm       | 30Plants         | 833 ml          |                   |
| 6     | Post inoculation spray | 5.0 ppm       | 30 Plants        | 833 ml          |                   |
| 7     | Pre inoculation spray  | 7.5 ppm       | 30Plants (10X3R) | 833 ml          | 2500ml            |
| 8     | Co-inoculation spray   | 7.5 ppm       | 30Plants         | 833 ml          |                   |
| 9     | Post inoculation spray | 7.5 ppm       | 30 Plants        | 833 ml          |                   |
| 10    | Pre inoculation spray  | 10.0 ppm      | 30Plants (10X3R) | 833 ml          | 2500ml            |
| 11    | Co-inoculation spray   | 10.0 ppm      | 30Plants         | 833 ml          |                   |
| 12    | Post inoculation spray | 10.0 ppm      | 30 Plants        | 833 ml          |                   |
| 13    | Carbendazim 50% WP     | 1 g/l         |                  |                 |                   |
| 14    | Untreated control      | -             |                  |                 |                   |

\*Total amount of protein molecule required (including handling wastage at field) is ~200mg.
